# Supplementary material for: Porphyrin Functionalized Carbon Quantum Dots for Enhanced Electrochemiluminescence and Sensitive Detection of Cu2+
Source: MDPI journal article supplement (doi:10.3390/molecules28031459), 2023-02-02
Supplement: s1 [file s1]

Supporting Information

# Porphyrin Functionalized Carbon Quantum Dots for Enhanced Electrochemiluminescence and Sensitive Detection of Cu<sup>2+</sup>

Xinying Zhang <sup>1,2</sup>, Xialing Hou <sup>1,2</sup>, Decheng Lu <sup>1,2</sup>, Yingying Chen <sup>1,2</sup> and Lingyan Feng <sup>1,2,\*</sup>

<sup>1</sup> Materials Genome Institute, Shanghai University, Shanghai 200444, China

<sup>2</sup> Shanghai Engineering Research Center of Organ Repair, Shanghai 200444, China

\* Correspondence: lingyanfeng@t.shu.edu.cn; Tel.: +86-21-66136189

And it was illustrated as follows: (M represents CQDs-TMPyP)

(1) Reduction reaction on electrode surface:

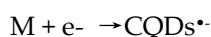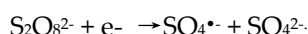

(2) The formation of excited states:

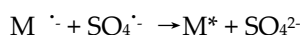

(3) The excited state returns to the ground state:

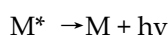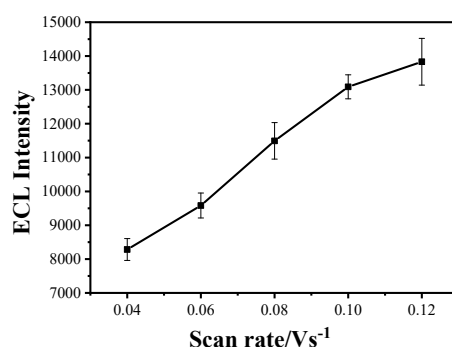

**Figure S1.** The ECL response of this biosensor for different scan rates.

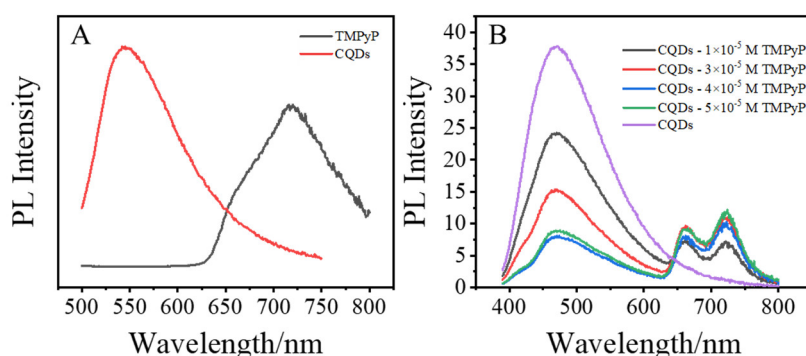

**Figure S2.** The fluorescence of CQDs and TMPyP; CQDs-TMPyP. (A) The fluorescence of CQDs (excitation peak 370 nm) and TMPyP (excitation peak 480 nm); (B) The fluorescence of CQDs-TMPyP with adding different amount of TMPyP (excitation peak 370 nm).

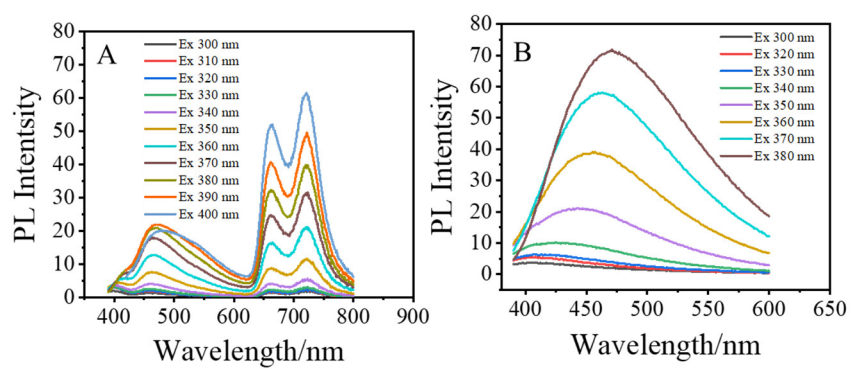

**Figure S3.** The florescence of TMPyP (A) and CQDs (B) at different excitation peaks.
